# Supplementary material
Source: ML conference proceedings conference paper supplement (https://openreview.net/forum?id=oMLQB4EZE1)
Supplement: supplementary_material [file attachment]

## A EXPERIMENTS

## A.1 ALL EXPERIMENT RESULTS

| Epigenetic Marks Prediction |              |              |              |              |              |              |
|-----------------------------|--------------|--------------|--------------|--------------|--------------|--------------|
|                             | H3           | H3K14ac      | H3K36me3     | H3K4me1      | H3K4me2      | H3K4me3      |
| DNABERT (3-mer)             | 74.15        | 42.07        | 48.49        | 42.95        | 31.34        | 28.92        |
| DNABERT (4-mer)             | 73.03        | 41.88        | 48.03        | 41.06        | 30.66        | 25.31        |
| DNABERT (5-mer)             | 73.40        | 40.68        | 48.29        | 40.65        | 30.67        | 27.10        |
| DNABERT (6-mer)             | 73.10        | 40.06        | 47.25        | 41.44        | 32.27        | 27.81        |
| NT-500M-human               | 69.67        | 33.55        | 44.14        | 37.15        | 30.87        | 24.06        |
| NT-500M-1000g               | 72.52        | 39.37        | 45.58        | 40.45        | 31.05        | 26.16        |
| NT-2500M-1000g              | 74.61        | 44.08        | 50.86        | 43.10        | 30.28        | 30.87        |
| NT-2500M-multi              | <u>78.77</u> | <u>56.20</u> | <b>61.99</b> | <b>55.30</b> | <u>36.49</u> | <u>40.34</u> |
| DNABERT-2                   | 78.27        | 52.57        | 56.88        | 50.52        | 31.13        | 36.27        |
| DNABERT-2♦                  | <b>80.17</b> | <b>57.42</b> | <u>61.90</u> | <u>53.00</u> | <b>39.89</b> | <b>41.20</b> |

  

| Epigenetic Marks Prediction |              |              |              |              | Promoter Detection |              |              |
|-----------------------------|--------------|--------------|--------------|--------------|--------------------|--------------|--------------|
|                             | H3K79me3     | H3K9ac       | H4           | H4ac         | all                | notata       | tata         |
| DNABERT (3-mer)             | 60.12        | 50.48        | 78.27        | 38.60        | 90.44              | 93.61        | 69.83        |
| DNABERT (4-mer)             | 59.77        | 51.44        | 78.28        | 36.40        | 89.54              | 92.65        | 66.78        |
| DNABERT (5-mer)             | 59.61        | 51.11        | 77.27        | 37.48        | 90.16              | 92.45        | 69.51        |
| DNABERT (6-mer)             | 61.17        | 51.22        | 79.26        | 37.43        | 90.48              | 93.05        | 61.56        |
| NT-500M-human               | 58.35        | 45.81        | 76.17        | 33.74        | 87.71              | 90.75        | 78.07        |
| NT-500M-1000g               | 59.33        | 49.29        | 76.29        | 36.79        | 89.76              | 91.75        | <u>78.23</u> |
| NT-2500M-1000g              | 61.20        | 52.36        | 79.76        | 41.46        | <u>90.95</u>       | 93.07        | 75.80        |
| NT-2500M-multi              | 64.70        | <u>56.01</u> | <u>81.67</u> | 49.13        | <b>91.01</b>       | 94.00        | <b>79.43</b> |
| DNABERT-2                   | <b>67.39</b> | 55.63        | 80.71        | <b>50.43</b> | 86.77              | <u>94.27</u> | 71.59        |
| DNABERT-2♦                  | <u>65.46</u> | <b>57.07</b> | <b>81.86</b> | <u>50.35</u> | 88.31              | <b>94.34</b> | 68.79        |

  

| Transcription Factor Prediction (Human) |              |              |              |              |              | Core Promoter Detection |              |              |
|-----------------------------------------|--------------|--------------|--------------|--------------|--------------|-------------------------|--------------|--------------|
|                                         | 0            | 1            | 2            | 3            | 4            | all                     | notata       | tata         |
| DNABERT (3-mer)                         | 67.95        | 70.90        | 60.51        | 53.03        | 69.76        | <b>70.92</b>            | 69.82        | <b>78.15</b> |
| DNABERT (4-mer)                         | 67.90        | <u>73.05</u> | 59.52        | 50.37        | 71.23        | 69.00                   | 70.04        | 74.25        |
| DNABERT (5-mer)                         | 66.97        | 69.98        | 59.03        | 52.95        | 69.26        | 69.48                   | 69.81        | <u>76.79</u> |
| DNABERT (6-mer)                         | 66.84        | 70.14        | 61.03        | 51.89        | 70.97        | 68.90                   | <u>70.47</u> | 76.06        |
| NT-500M-human                           | 61.59        | 66.75        | 53.58        | 42.95        | 60.81        | 63.45                   | 64.82        | 71.34        |
| NT-500M-1000g                           | 63.64        | 70.17        | 52.73        | 45.24        | 62.82        | 66.70                   | 67.17        | 73.52        |
| NT-2500M-1000g                          | 66.31        | 68.30        | 58.70        | 49.08        | 67.59        | 67.39                   | 67.46        | 69.66        |
| NT-2500M-multi                          | 66.64        | 70.28        | 58.72        | 51.65        | 69.34        | <u>70.33</u>            | <b>71.58</b> | 72.97        |
| DNABERT-2                               | <b>71.99</b> | <b>76.06</b> | <b>66.52</b> | <b>58.54</b> | <b>77.43</b> | 69.37                   | 68.04        | 74.17        |
| DNABERT-2♦                              | <u>69.12</u> | 71.87        | <u>62.96</u> | <u>55.35</u> | <u>74.94</u> | 67.50                   | 69.53        | 76.18        |

  

| Transcription Factor Prediction (Mouse) |              |              |              |              |              | Virus        | Splice       |
|-----------------------------------------|--------------|--------------|--------------|--------------|--------------|--------------|--------------|
|                                         | 0            | 1            | 2            | 3            | 4            | Covid        | Reconstruct  |
| DNABERT (3-mer)                         | 42.31        | 79.10        | 69.90        | 55.40        | 41.97        | 62.23        | 84.14        |
| DNABERT (4-mer)                         | 49.42        | 79.95        | 72.62        | 51.79        | 44.13        | 59.87        | 84.05        |
| DNABERT (5-mer)                         | 42.45        | 79.32        | 62.22        | 49.92        | 40.34        | 50.46        | 84.02        |
| DNABERT (6-mer)                         | 44.42        | 78.94        | 71.44        | 44.89        | 42.48        | 55.50        | 84.07        |
| NT-500M-human                           | 31.04        | 75.04        | 61.67        | 29.17        | 29.27        | 50.82        | 79.71        |
| NT-500M-1000g                           | 39.26        | 75.49        | 64.70        | 33.07        | 34.01        | 52.06        | 80.97        |
| NT-2500M-1000g                          | 48.31        | 80.02        | 70.14        | 42.25        | 43.40        | 66.73        | 85.78        |
| NT-2500M-multi                          | <u>63.31</u> | 83.76        | 71.52        | <u>69.44</u> | 47.07        | <b>73.04</b> | <b>89.35</b> |
| DNABERT-2                               | 56.76        | 84.77        | 79.32        | 66.47        | <b>52.66</b> | <u>71.02</u> | 84.99        |
| DNABERT-2♦                              | <b>64.23</b> | <b>86.28</b> | <b>81.28</b> | <b>73.49</b> | <u>50.80</u> | 68.49        | <u>85.93</u> |

Table 4: This table presents the performance of all the models on the GUE benchmark. ♦: perform further pre-training on the training sets of the GUE benchmark.

|               | EMP | TF-M | CVC | TF-H | PD-tata | PD-o | CPD-tata | CPD-o | SSP |
|---------------|-----|------|-----|------|---------|------|----------|-------|-----|
| <b>Epochs</b> | 3   | 1k   | 8   | 3    | 10      | 4    | 10       | 4     | 5   |

Table 5: The number of training steps we used for the following tasks: Epigenetic Marks Prediction (EMP), Transcription Factor Prediction on the Human genome and the Mouse genome (TF-H and TF-M), Covid Variants Classification (CVC), *tata* dataset of Promoter Detection (PD-tata), *notata* and *all* datasets of Promoter Detection (PD-o), *tata* dataset of Core Promoter Detection (CPD-tata), *notata* and *all* datasets of Core Promoter Detection (CPD-o), and Splice Site Prediction (SSP). In the task of Transcription Factor Prediction on the Mouse genome, we train the model for 1000 steps on each dataset.

## A.2 IMPLEMENTATION

We pre-train DNABERT-2 with the Masked Language Modeling (MLM) loss with a mask ratio of 15%. Notably, we independently mask every token instead of masking spans of continuous tokens like Ji et al. (2021). We use a batch size of 4096 and a max sequence length of 128. We train the model for 500000 steps using the AdamW (Loshchilov & Hutter, 2019) optimizer with  $\beta_1 = 0.9$ ,  $\beta_2 = 0.98$ ,  $\epsilon = 1e-6$  and weight decay of  $1e-5$ . The learning rate linearly increases from 0 to  $5e-4$  during the first 30000 steps while linearly decreasing to 0 in the last 470000 steps.

## A.3 HYPERPARAMETERS

This section presents the hyperparameters we used in the fine-tuning stage on each model. Table 5 shows the number of training steps we used for each task. We use AdamW (Loshchilov & Hutter, 2019) as optimizer. We keep most of the other hyperparameters the same for all the models across all the datasets, including a batch size of 32, a warmup step of 50, and a weight decay of 0.01. For DNABERT and DNABERT-2, we perform standard fine-tuning with a learning rate of  $3e-5$ , while for the Nucleotide Transformers, we perform parameter efficient fine-tuning (PEFT) using Low-Rank Adaptation (LoRA) with a learning rate of  $1e-4$ , a LoRA alpha of 16, a LoRA dropout of 0.05, and a LoRA  $r$  of 8. The hyperparameters are selected based on grid searches over commonly used ones in preliminary experiments. The pre-training stage takes approximately 14 days using eight Nvidia RTX 2080Ti GPUs. To train the model, we used the Transformers library (Wolf et al., 2020) and the Composer library (Team, 2021).

## A.4 PRELIMINARY EXPERIMENTS ON NUCLEOTIDE TRANSFORMER

Since there is no official fine-tuning code of Nucleotide Transformer (Dalla-Torre et al., 2023), we use its open-sourced checkpoints in Huggingface Modelhub<sup>2</sup> and train it with our code base using LoRA. For a fair comparison with this model, in this section, we present preliminary experiments that compare the results reported in their paper with the performance of this model under our implementation. We select the epigenetic marks prediction task for benchmarking since it is the only shared task among Dalla-Torre et al. (2023) and GUE. The task contains 10 datasets. For each dataset, we randomly split it into training and test sets with a ratio of 9:1. As shown in Table 6, our LoRA implementation leads to slightly better results than the results reported in the original paper, making our comparison to the model fair and convincing despite the fact that we do not have access to its official fine-tuning implementation.

<sup>2</sup><https://huggingface.co/InstaDeepAI>

|                     | H3    | H3K14ac | H3K36me3 | H3K4me1 | H3K4me2 | H3K4me3 |
|---------------------|-------|---------|----------|---------|---------|---------|
| <b>500M-human*</b>  | 72.00 | 37.00   | 45.00    | 36.00   | 27.00   | 24.00   |
| <b>500M-human</b>   | 69.67 | 33.55   | 44.14    | 37.15   | 30.87   | 24.06   |
| <b>500M-1000g*</b>  | 74.00 | 38.00   | 47.00    | 38.00   | 26.00   | 24.00   |
| <b>500M-1000g</b>   | 72.52 | 39.37   | 45.58    | 40.45   | 31.05   | 26.16   |
| <b>2500M-1000g*</b> | 75.00 | 45.00   | 53.00    | 42.00   | 28.00   | 31.00   |
| <b>2500M-1000g</b>  | 74.61 | 44.08   | 50.86    | 43.10   | 30.28   | 30.87   |
| <b>2500M-multi*</b> | 79.00 | 54.00   | 62.00    | 54.00   | 32.00   | 41.00   |
| <b>2500M-multi</b>  | 78.77 | 56.20   | 61.99    | 55.30   | 36.49   | 40.34   |

|                     | H3K79me3 | H3K9ac | H4    | H4ac  | Average      |
|---------------------|----------|--------|-------|-------|--------------|
| <b>500M-human*</b>  | 57.00    | 45.00  | 75.00 | 33.00 | 45.10        |
| <b>500M-human</b>   | 58.35    | 45.81  | 76.17 | 33.74 | <b>45.35</b> |
| <b>500M-1000g*</b>  | 56.00    | 48.00  | 76.00 | 34.00 | 46.10        |
| <b>500M-1000g</b>   | 59.33    | 49.29  | 76.29 | 36.79 | <b>47.68</b> |
| <b>2500M-1000g*</b> | 57.00    | 49.00  | 79.00 | 41.00 | 50.00        |
| <b>2500M-1000g</b>  | 61.20    | 52.36  | 79.76 | 41.46 | <b>50.86</b> |
| <b>2500M-multi*</b> | 62.00    | 55.00  | 81.00 | 49.00 | 56.90        |
| <b>2500M-multi</b>  | 64.70    | 56.01  | 81.67 | 49.13 | <b>58.06</b> |

Table 6: This table presents the performance of the Nucleotide Transformer on ten datasets of epigenetic marks prediction on the Yeast genome. As shown in the table, our implementation achieves better performance than the results reported in the paper, indicating the fairness of comparison in our experiments. \*: Results taken from [Dalla-Torre et al. \(2023\)](#).

## B DATA

### B.1 MULTI-SPECIES GENOME FOR PRE-TRAINING

Table 7 lists the 135 species in 7 categories that we randomly selected for genome foundation model pre-training and presents the number of nucleotides we achieved from each species.

| Category         | Species                    | Num. of Nucleotides (M) |
|------------------|----------------------------|-------------------------|
| <b>Fungi</b>     | Ceratobasidium             | 655.37                  |
|                  | Claviceps Maximensis       | 329.79                  |
|                  | Fusarium Annulatum         | 449.98                  |
|                  | Melampsora                 | 699.52                  |
|                  | Metschnikowia              | 109.36                  |
|                  | Mucor Saturninus           | 391.17                  |
|                  | Penicillium Chermesinum    | 275.81                  |
|                  | Saccharomyces Cerevisiae   | 121.54                  |
|                  | Sporopachydermia Quercuum  | 155.71                  |
|                  | Tranzscheliella Williamsii | 184.77                  |
|                  | Xylariales                 | 399.96                  |
| <b>Protozoa</b>  | Phytophthora Sojae         | 792.65                  |
|                  | Pythium Apiculatum         | 450.99                  |
| <b>Mammalian</b> | Bubalus Bubalis            | 28768.00                |
|                  | Camelus Dromedarius        | 19757.02                |
|                  | Human                      | 31372.10                |
|                  | Macaca Assamensis          | 27593.76                |
|                  | Macaca Nigra               | 28217.13                |
|                  | Mus Musculus               | 26545.98                |

(Continued on next page)

(Continued from previous page)

| Category                | Species                                          | Nucleotides (M) |
|-------------------------|--------------------------------------------------|-----------------|
|                         | Peromyscus Californicus                          | 24677.56        |
| <b>Invertebrate</b>     | Brachionus Rubens                                | 1327.37         |
|                         | Ceroptres Masudai                                | 12.95           |
|                         | Cotesia Typhae                                   | 1866.62         |
|                         | Croniades Pieria                                 | 3889.85         |
|                         | Drosophila Athabasca                             | 1221.16         |
|                         | Emesis Russula                                   | 4848.08         |
|                         | Hydra Oligactis                                  | 12597.75        |
|                         | Meganola Albula                                  | 3604.25         |
|                         | Oscheius                                         | 383.21          |
|                         | Rutpela Maculata                                 | 20213.33        |
| <b>Other Vertebrate</b> | Anas Zonorhyncha                                 | 11697.08        |
|                         | Coregonus Clupeaformis                           | 26824.02        |
|                         | Gnathonemus Longibarbis                          | 7314.74         |
|                         | Myxocyprinus Asiaticus                           | 23407.19        |
|                         | Rhipidura Dahli                                  | 10112.96        |
| <b>Bacteria</b>         | Aeromonas                                        | 47.33           |
|                         | Agrobacterium                                    | 97.22           |
|                         | Alcaligenaceae Bacterium                         | 20.88           |
|                         | Aliivibrio                                       | 46.48           |
|                         | Alphaproteobacteria Bacterium                    | 14.22           |
|                         | Amycolatopsis Antarctica                         | 63.43           |
|                         | Anaerostipes Faecis                              | 32.00           |
|                         | Arthrobacter                                     | 36.27           |
|                         | Atopobium                                        | 28.63           |
|                         | Bacillus Bc15                                    | 57.34           |
|                         | Bacillus Bs3 2021                                | 43.51           |
|                         | Bacterium                                        | 7.54            |
|                         | Bacteroidetes Bacterium Qs                       | 8.99            |
|                         | Breoghanian Corrubedonensis                      | 53.32           |
|                         | Caldicoprobacter Oshimai                         | 27.25           |
|                         | Candidatus Cryptobacteroides Excrementipullorum  | 27.63           |
|                         | Candidatus Dadabacteria Bacterium Rbg Combo      | 11.49           |
|                         | Candidatus Dwaynia Gallinarum                    | 16.82           |
|                         | Candidatus Falkowbacteria Bacterium              | 13.88           |
|                         | Candidatus Geothermincola Secundus               | 24.76           |
|                         | Candidatus Gottesmanbacteria Bacterium           | 11.08           |
|                         | Candidatus Nomurabacteria Bacterium Full         | 6.29            |
|                         | Candidatus Portnoybacteria Bacterium Big Fil Rev | 8.17            |
|                         | Candidatus Regiella Insecticola                  | 20.62           |
|                         | Candidatus Roizmanbacteria Bacterium Combo All   | 11.13           |
|                         | Candidatus Rokubacteria Bacterium                | 22.06           |
|                         | Candidatus Saccharibacteria Bacterium            | 6.55            |
|                         | Candidatus Staskawiczbacteria Bacterium Full     | 6.79            |
|                         | Christensenella                                  | 18.75           |
|                         | Clostridiaceae Bacterium                         | 29.62           |
|                         | Clostridiales Bacterium                          | 16.59           |
|                         | Clostridium Cag 505                              | 21.26           |
|                         | Clostridium Mcc328                               | 36.43           |
|                         | Clostridium Nexile                               | 38.43           |
|                         | Clostridium Uba3521                              | 25.99           |
|                         | Collinsella Urealyticum                          | 19.45           |
|                         | Coprobacillus Cateniformis                       | 38.38           |

(Continued on next page)

(Continued from previous page)

| Category        | Species                                     | Nucleotides (M) |
|-----------------|---------------------------------------------|-----------------|
| <b>Bacteria</b> | Cyanobium                                   | 40.33           |
|                 | Dehalococcoidia Bacterium                   | 17.59           |
|                 | Enterobacteriaceae Bacterium                | 41.46           |
|                 | Evtapia Gabavorous                          | 24.94           |
|                 | Firmicutes Bacterium                        | 36.66           |
|                 | Fulvivirga                                  | 65.24           |
|                 | Jeongeupia Chitinilytica                    | 39.11           |
|                 | Legionella Endosymbiont Of Polyplax Serrata | 5.30            |
|                 | Listeria Ilorinensis                        | 30.31           |
|                 | Maribacter Cobaltidurans                    | 46.40           |
|                 | Marinomonas                                 | 37.73           |
|                 | Mesorhizobium                               | 65.15           |
|                 | Methyloceanibacter Caenitepidi              | 34.25           |
|                 | Microvirga                                  | 68.63           |
|                 | Mycolicibacter Engbaekii                    | 45.21           |
|                 | Novosphingobium                             | 46.18           |
|                 | Omnitrophica Wor Bacterium Rbg              | 12.52           |
|                 | Pantoea                                     | 43.14           |
|                 | Paraburkholderia Edwinii                    | 82.99           |
|                 | Parerythrobacter Lutipelagi                 | 30.98           |
|                 | Paulownia Witches Phytoplasma               | 8.92            |
|                 | Polaromonas Eurypsychrophila                | 41.61           |
|                 | Prevotella Ag 487 50 53                     | 29.63           |
|                 | Prevotella Uba3619                          | 31.72           |
|                 | Prevotella Uba634                           | 18.51           |
|                 | Prochlorococcus Ag-321-I09                  | 3.29            |
|                 | Prochlorococcus Ag-363-B18                  | 15.54           |
|                 | Prochlorococcus Ag-402-L19                  | 11.17           |
|                 | Prochlorococcus Scb243 498N4                | 14.12           |
|                 | Providencia                                 | 41.89           |
|                 | Pseudomonas 35 E 8                          | 63.56           |
|                 | Pseudomonas Bigb0408                        | 59.52           |
|                 | Pseudomonas P867                            | 62.01           |
|                 | Pseudomonas Promysalinigenes                | 50.47           |
|                 | Roseobacter                                 | 44.14           |
|                 | Salinicola Peritrichatus                    | 46.19           |
|                 | Salmonella S096 02912                       | 48.09           |
|                 | Salmonella Zj-F75                           | 47.87           |
|                 | Sinorhizobium                               | 65.53           |
|                 | Sodalis Ligni                               | 63.85           |
|                 | Sphaerochaeta                               | 28.61           |
|                 | Sphingobacterium                            | 36.55           |
|                 | Sphingomonas Carotinifaciens                | 37.53           |
|                 | Sphingomonas Mesophila                      | 22.91           |
|                 | Sporosarcina Jiandibaonis                   | 36.30           |
|                 | Sporosarcina Ureilytica                     | 34.37           |
|                 | Staphylococcus Gdq20D1P                     | 28.50           |
|                 | Staphylococcus M0911                        | 24.38           |
|                 | Streptococcus                               | 22.18           |
|                 | Streptomyces 8401                           | 88.39           |
|                 | Streptomyces Di166                          | 88.71           |
|                 | Streptomyces Durbertensis                   | 59.24           |
|                 | Streptomyces Neau-Yj-81                     | 118.84          |
|                 | Streptomyces Rk74B                          | 87.36           |
|                 | Thermopetrobacter                           | 26.06           |

(Continued on next page)

(Continued from previous page)

| Category        | Species                          | Nucleotides (M) |
|-----------------|----------------------------------|-----------------|
| <b>Bacteria</b> | Uncultured Kushneria             | 35.31           |
|                 | Uncultured Phascolarctobacterium | 17.95           |
|                 | Uncultured Proteus               | 35.66           |
|                 | Verrucomicrobiales Bacterium     | 3.15            |
|                 | Vibrio                           | 41.47           |
|                 | Victivallis Lenta                | 55.45           |
|                 | Virgibacillus Salexigens         | 44.18           |
|                 | Xanthomonadales Bacterium        | 37.47           |

Table 7: Details statistics of the multi-species genome dataset for pre-training.

## B.2 GENOME UNDERSTANDING EVALUATION (GUE)

| Task                                           | Metric     | Datasets                     | Train / Dev / Test  |
|------------------------------------------------|------------|------------------------------|---------------------|
| <b>Core Promoter Detection</b>                 | <b>mcc</b> | tata                         | 4904 / 613 / 613    |
|                                                |            | notata                       | 42452 / 5307 / 5307 |
|                                                |            | all                          | 47356 / 5920 / 5920 |
| <b>Promoter Detection</b>                      | <b>mcc</b> | tata                         | 4904 / 613 / 613    |
|                                                |            | notata                       | 42452 / 5307 / 5307 |
|                                                |            | all                          | 47356 / 5920 / 5920 |
| <b>Transcription Factor Prediction (Human)</b> | <b>mcc</b> | wgEncodeEH000552             | 32378 / 1000 / 1000 |
|                                                |            | wgEncodeEH000606             | 30672 / 1000 / 1000 |
|                                                |            | wgEncodeEH001546             | 19000 / 1000 / 1000 |
|                                                |            | wgEncodeEH001776             | 27294 / 1000 / 1000 |
|                                                |            | wgEncodeEH002829             | 19000 / 1000 / 1000 |
| <b>Splice Site Prediction</b>                  | <b>mcc</b> | reconstructed                | 36496 / 4562 / 4562 |
| <b>Transcription Factor prediction (Mouse)</b> | <b>mcc</b> | Ch12Nrf2Iggrab               | 6478 / 810 / 810    |
|                                                |            | Ch12Znf384hpa004051Iggrab    | 53952 / 6745 / 6745 |
|                                                |            | MelJundIggrab                | 2620 / 328 / 328    |
|                                                |            | MelMafkDm2p5dStd             | 1904 / 239 / 239    |
|                                                |            | MelNelfeIggrab               | 15064 / 1883 / 1883 |
| <b>Epigenetic Marks Prediction</b>             | <b>mcc</b> | H3                           | 11971 / 1497 / 1497 |
|                                                |            | H3K14ac                      | 26438 / 3305 / 3305 |
|                                                |            | H3K36me3                     | 27904 / 3488 / 3488 |
|                                                |            | H3K4me1                      | 25341 / 3168 / 3168 |
|                                                |            | H3K4me2                      | 24545 / 3069 / 3069 |
|                                                |            | H3K4me3                      | 29439 / 3680 / 3680 |
|                                                |            | H3K79me3                     | 23069 / 2884 / 2884 |
|                                                |            | H3K9ac                       | 22224 / 2779 / 2779 |
|                                                |            | H4                           | 11679 / 1461 / 1461 |
|                                                |            | H4ac                         | 27275 / 3410 / 3410 |
| <b>Virus</b>                                   | <b>f1</b>  | Covid variant classification | 77669 / 7000 / 7000 |

Table 8: Statistics of tasks in the GUE benchmark, including the name and the number of training, validation, and test samples in each dataset.

The proposed benchmark Genome Understanding Evaluation (GUE) contains 28 datasets of 7 biological important genome analysis tasks for 4 different species. To comprehensively evaluate the genome foundation models in modeling variable-length sequences, we select tasks with input lengths ranging from 70 to 1000. Table 8 presents the details statistics of each evaluation dataset. The following tasks are included in the GUE benchmark.

**Promoter detection (Human)** focuses on identifying (proximal) promoter regions, crucial sequences in the human genome responsible for instigating transcription. As many primary regulatory elements are located in this region, accurately detecting these sites is instrumental in advancing

our grasp of gene regulation mechanisms and pinpointing the genomic underpinnings of numerous diseases. The dataset is divided twofold, TATA and non-TATA, based on whether a TATA box motif is present in the sequence. We extract -249 +50 bp around the transcription start site (TSS) from TATA and non-TATA promoters downloaded from Eukaryotic Promoter Database (EPDnew) (Dreos et al., 2013) and use it as our promoter class. Meanwhile, we construct the non-promoter class with equal-sized randomly selected sequences outside of promoter regions but with TATA motif (TATA non-promoters) or randomly substituted sequences (non-TATA, non-promoters). We also combine the TATA and non-TATA datasets to obtain a combined dataset named *all*.

**Core promoter detection (Human)** is similar to proximal promoter detection with a focus on predicting the core promoter region only, the central region closest to the TSS and start codon. A much shorter context window (center -34 +35 bp around TSS) is provided, making this a more challenging task than proximal promoter prediction.

**Transcription factor binding site prediction (Human)** predicts binding sites of transcription factors (TF), the key proteins that regulate gene expression in the human genome. Their accurate prediction is key to deciphering complex genetic interactions and identifying potential targets for gene therapies. We accessed the legacy 690 ENCODE ChIP-seq experiments (Consortium et al., 2012) via the UCSC genome browser, which encompasses 161 TF binding profiles in 91 human cell lines. We extracted a 101-bp region around the center of each peak as TFBS class and nonoverlapping sequences with the same length and GC content as non-TFBS class. Finally, we randomly select 5 datasets out of a subset of 690 that we curated by heuristically filtering out tasks that are either too trivial (e.g., over 0.95 F1) or too challenging (e.g., less than 0.50 F1) for existing language models.

**Splice site prediction (Human)** predicts splice donor and acceptor sites, which are the exact locations in the human genome where alternative splicing occurs. This prediction is crucial to understanding protein diversity and the implications of aberrant splicing in genetic disorders. The dataset (Wang et al., 2019) consists of 400-bp-long sequences extracted from Ensembl GRCh38 human reference genome. As suggested by Ji et al. (2021), existing models can achieve almost perfect performance on the original dataset, containing 10,000 splice donors, acceptors, and non-splice site sequences, which is overly optimistic on detecting non-canonical sites in reality. As such, we reconstruct the dataset by iteratively adding adversarial examples (unseen false positive predictions in hold-out set) in order to make this task more challenging.

**Transcription factor binding site prediction (Mouse)** predicts the binding site of transcription factors on mouse genomes. Similar to human binding site data, we obtain mouse ENCODE ChIP-seq data (Stamatoyannopoulos et al., 2012), which is the largest available collection on the UCSC genome browser (n=78). This time, the negative examples are created using dinucleotide shuffling while preserving relative frequencies, while all other settings stay the same as the human TFBS prediction dataset. We also randomly select 5 datasets out of the 78 datasets using the same process described above.

**Epigenetic marks prediction (Yeast)** predicts epigenetic marks in yeast, modifications on the genetic material that influence gene expression without altering the DNA sequence. Precise prediction of these marks aids in elucidating the role of epigenetics in yeast. We download the 10 datasets from <http://www.jaist.ac.jp/~tran/nucleosome/members.htm> and randomly split each dataset into training, validation, and test sets with a ratio of 8:1:1.

**Covid variant prediction (Virus)** aims to predict the variant type of the SARS-CoV\_2 virus based on 1000-length genome sequences. We download the genomes from the EpiCoV database (Khare et al., 2021) of the Global Initiative on Sharing Avian Influenza Data (GISAID). We consider 9 types of SARS-CoV\_2 variants, including *Alpha*, *Beta*, *Delta*, *Eta*, *Gamma*, *Iota*, *Kappa*, *Lambda* and *Zeta*.
